# Supplementary material for: Drosophila melanogaster Natural Variation Affects Growth Dynamics of Infecting Listeria monocytogenes
Source: PubMed Central journal article supplement (PMC4683632; doi:10.1534/g3.115.022558), 2015-10-04
Supplement: supp_g3.115.022558_TableS1.pdf [file supp_g3.115.022558_TableS1.pdf]

Table S1:

| line    | Injection MTD | line    | Injection MTD | line    | Injection MTD |
|---------|---------------|---------|---------------|---------|---------------|
| RAL_105 | 4             | RAL_378 | 7             | RAL_75  | 4             |
| RAL_109 | 6             | RAL_379 | 4             | RAL_765 | 6             |
| RAL_136 | 9             | RAL_38  | 5             | RAL_774 | 5             |
| RAL_149 | 4             | RAL_380 | 7             | RAL_786 | 5             |
| RAL_158 | 4             | RAL_382 | 2             | RAL_787 | 6             |
| RAL_161 | 5             | RAL_385 | 6             | RAL_790 | 5             |
| RAL_176 | 2             | RAL_387 | 6             | RAL_796 | 3             |
| RAL_177 | 4             | RAL_398 | 6             | RAL_801 | 7             |
| RAL_208 | 6             | RAL_40  | 5             | RAL_804 | 6             |
| RAL_21  | 4             | RAL_405 | 5             | RAL_808 | 6             |
| RAL_228 | 6             | RAL_406 | 5             | RAL_810 | 4             |
| RAL_235 | 5             | RAL_42  | 6             | RAL_812 | 6             |
| RAL_237 | 5             | RAL_427 | 6             | RAL_818 | 4             |
| RAL_239 | 5             | RAL_437 | 7             | RAL_819 | 3             |
| RAL_28  | 8             | RAL_443 | 5             | RAL_821 | 9             |
| RAL_280 | 6             | RAL_45  | 6             | RAL_822 | 5             |
| RAL_287 | 5             | RAL_486 | 6             | RAL_837 | 6             |
| RAL_301 | 5             | RAL_491 | 9             | RAL_843 | 5             |
| RAL_303 | 6             | RAL_502 | 6             | RAL_85  | 5             |
| RAL_304 | 6             | RAL_508 | 3             | RAL_850 | 4             |
| RAL_309 | 8             | RAL_513 | 4             | RAL_852 | 6             |
| RAL_313 | 3             | RAL_517 | 6             | RAL_853 | 3             |
| RAL_315 | 6             | RAL_530 | 6             | RAL_855 | 5             |
| RAL_318 | 6             | RAL_535 | 6             | RAL_857 | 5             |
| RAL_320 | 6             | RAL_563 | 5             | RAL_859 | 6             |
| RAL_321 | 1             | RAL_57  | 4             | RAL_861 | 5             |
| RAL_324 | 4             | RAL_589 | 5             | RAL_879 | 5             |
| RAL_325 | 5             | RAL_59  | 2             | RAL_882 | 7             |
| RAL_336 | 5             | RAL_595 | 5             | RAL_884 | 3             |
| RAL_338 | 3             | RAL_639 | 4             | RAL_890 | 6             |
| RAL_350 | 4             | RAL_703 | 4             | RAL_897 | 3             |
| RAL_352 | 5             | RAL_705 | 6             | RAL_900 | 5             |
| RAL_356 | 2             | RAL_712 | 2             | RAL_907 | 5             |
| RAL_358 | 5             | RAL_716 | 7             | RAL_908 | 4             |
| RAL_359 | 8             | RAL_73  | 3             | RAL_91  | 6             |
| RAL_370 | 5             | RAL_730 | 8             | RAL_913 | 4             |
| RAL_371 | 5             | RAL_732 | 5             |         |               |
| RAL_373 | 6             | RAL_737 | 5             |         |               |
| RAL_375 | 5             | RAL_738 | 5             |         |               |
| RAL_377 | 7             | RAL_748 | 5             |         |               |

**Table S1 Median time to death of RAL-lines:** The median time to death in days from the RAL lines infected with 1000 CFU of *L. monocytogenes*.
