# Supplementary material for: Drosophila melanogaster Natural Variation Affects Growth Dynamics of Infecting Listeria monocytogenes
Source: PubMed Central journal article supplement (PMC4683632; doi:10.1534/g3.115.022558), 2015-10-04
Supplement: supp_g3.115.022558_TableS2.pdf [file supp_g3.115.022558_TableS2.pdf]

| line    | Log CFU     | line    | Log CFU     | line    | Log CFU     |
|---------|-------------|---------|-------------|---------|-------------|
| RAL_101 | 4.986718647 | RAL_379 | 5.37942568  | RAL_765 | 4.605305046 |
| RAL_105 | 5.039373367 | RAL_38  | 4.783691418 | RAL_774 | 5.020498846 |
| RAL_109 | 4.36162519  | RAL_380 | 3.943988875 | RAL_783 | 4.969881644 |
| RAL_136 | 4.49966751  | RAL_382 | 5.877083257 | RAL_786 | 5.133245204 |
| RAL_149 | 4.962126717 | RAL_385 | 4.98811284  | RAL_787 | 4.103803721 |
| RAL_158 | 4.954641051 | RAL_387 | 5.197280558 | RAL_790 | 4.581494542 |
| RAL_161 | 5.138850438 | RAL_40  | 5.513883186 | RAL_796 | 5.572290606 |
| RAL_176 | 5.705093264 | RAL_405 | 5.000434077 | RAL_801 | 4.120573931 |
| RAL_177 | 5.230328668 | RAL_406 | 5.193124598 | RAL_804 | 4.898999271 |
| RAL_181 | 6.021169602 | RAL_42  | 4.230734256 | RAL_808 | 5.084576278 |
| RAL_208 | 4.801512612 | RAL_427 | 4.35560404  | RAL_810 | 4.970114322 |
| RAL_21  | 4.969002035 | RAL_437 | 4.409459182 | RAL_812 | 4.670709595 |
| RAL_217 | 4.511370855 | RAL_443 | 4.838849091 | RAL_818 | 5.492061605 |
| RAL_227 | 5.832555869 | RAL_45  | 4.572871602 | RAL_819 | 5.562292864 |
| RAL_228 | 4.748536734 | RAL_491 | 4.548389418 | RAL_821 | 3.977952121 |
| RAL_235 | 5.314920056 | RAL_502 | 4.961421094 | RAL_822 | 5.210853365 |
| RAL_237 | 5.100370545 | RAL_508 | 5.171726454 | RAL_837 | 5.100370545 |
| RAL_239 | 4.621176282 | RAL_513 | 5.098643726 | RAL_843 | 4.796574333 |
| RAL_280 | 5.41987725  | RAL_517 | 4.487138375 | RAL_849 | 4.465382851 |
| RAL_287 | 5.08695426  | RAL_530 | 5.138302698 | RAL_85  | 5.098643726 |
| RAL_309 | 4.065166884 | RAL_535 | 4.433769834 | RAL_850 | 5.080987047 |
| RAL_318 | 5.321894069 | RAL_563 | 4.804480189 | RAL_852 | 4.846337112 |
| RAL_320 | 4.671172843 | RAL_57  | 4.887054378 | RAL_853 | 4.963551734 |
| RAL_325 | 5.18180599  | RAL_589 | 5.320146286 | RAL_855 | 5.128722284 |
| RAL_336 | 5.042575512 | RAL_59  | 6.382864073 | RAL_857 | 5.496929648 |
| RAL_338 | 5.341406354 | RAL_595 | 5.181843588 | RAL_859 | 5.201397124 |
| RAL_340 | 4.532117116 | RAL_639 | 5.267171728 | RAL_861 | 6.072433726 |
| RAL_350 | 5.013858231 | RAL_703 | 4.974511693 | RAL_879 | 5.141449773 |
| RAL_352 | 5.290034611 | RAL_705 | 4.694605199 | RAL_882 | 4.276461804 |
| RAL_356 | 4.877946952 | RAL_712 | 5.781755375 | RAL_884 | 5.193124598 |
| RAL_358 | 5.13433578  | RAL_712 | 5.359835482 | RAL_890 | 4.556302501 |
| RAL_359 | 3.808885867 | RAL_716 | 4.862727528 | RAL_897 | 5.009875634 |
| RAL_370 | 5.021189299 | RAL_73  | 5.390345833 | RAL_900 | 4.958802703 |
| RAL_371 | 4.669316881 | RAL_732 | 4.875916969 | RAL_907 | 5.08278537  |
| RAL_373 | 4.29666519  | RAL_737 | 4.810904281 | RAL_908 | 4.675778342 |
| RAL_375 | 5.23299611  | RAL_738 | 4.896526217 | RAL_91  | 5.370017435 |
| RAL_377 | 4.662757832 | RAL_748 | 4.757396029 | RAL_913 | 5.213517757 |
| RAL_378 | 4.744292983 | RAL_75  | 5.302954057 |         |             |

**Table S2 Median percent of life shortened of RAL-lines:** The bacterial load after 48 hours from the RAL lines infected with 1000 CFU of *L. monocytogenes*.
