# Supplementary material for: Drosophila melanogaster Natural Variation Affects Growth Dynamics of Infecting Listeria monocytogenes
Source: PubMed Central journal article supplement (PMC4683632; doi:10.1534/g3.115.022558), 2015-10-04
Supplement: supp_g3.115.022558_TableS3.pdf [file supp_g3.115.022558_TableS3.pdf]

| Name    | CFU Day<br>2 | MTD |
|---------|--------------|-----|
| RAL 382 | 753,500      | 2   |
| RAL 59  | 2,414,700    | 2   |
| RAL 73  | 246,000      | 3   |
| RAL 508 | 149,000      | 3   |
| RAL 375 | 171,000      | 5   |
| RAL 732 | 75,100       | 5   |
| RAL 787 | 12,700       | 6   |
| RAL 309 | 11,620       | 8   |
| RAL 359 | 6,440        | 8   |
| RAL 136 | 31,600       | 9   |
| RAL 821 | 9,510        | 9   |

**Table S3 Immune phenotypes of RAL lines that are further studied:** The bacterial load after 48 hours and median time to death in days from each of the 11 lines studied are listed here. Lines were chosen to have different immune phenotypes.
