# Supplementary material for: Drosophila melanogaster Natural Variation Affects Growth Dynamics of Infecting Listeria monocytogenes
Source: PubMed Central journal article supplement (PMC4683632; doi:10.1534/g3.115.022558), 2015-10-04
Supplement: supp_g3.115.022558_TableS4.pdf [file supp_g3.115.022558_TableS4.pdf]

Table S4:

|                          | RAL 375            | RAL 309            | RAL 359           | RAL 821           | RAL 59             | RAL 732            | RAL 382           |
|--------------------------|--------------------|--------------------|-------------------|-------------------|--------------------|--------------------|-------------------|
| Logistic growth          |                    |                    |                   |                   |                    |                    |                   |
| Best-fit values          |                    |                    |                   |                   |                    |                    |                   |
| YM                       | 12.36              | 11.07              | 7.751             | 7.318             | 13.35              | 12.08              | 11.87             |
| Y0                       | 4.925              | 5.156              | 4.435             | 4.518             | 4.596              | 5.089              | 4.594             |
| k                        | 0.05386            | 0.02846            | 0.08817           | 0.08433           | 0.07044            | 0.03643            | 0.09164           |
| Std. Error               |                    |                    |                   |                   |                    |                    |                   |
| YM                       | 0.1651             | 0.0801             | 0.1938            | 0.1378            | 0.164              | 0.1799             | 0.1682            |
| Y0                       | 0.1364             | 0.07074            | 0.3051            | 0.2356            | 0.1055             | 0.123              | 0.1398            |
| k                        | 0.003431           | 0.001265           | 0.02224           | 0.01887           | 0.003211           | 0.00244            | 0.005953          |
| 95% Confidence Intervals |                    |                    |                   |                   |                    |                    |                   |
| YM                       | 12.04 to 12.69     | 10.92 to 11.23     | 7.369 to 8.132    | 7.048 to 7.589    | 13.03 to 13.68     | 11.73 to 12.43     | 11.54 to 12.20    |
| Y0                       | 4.656 to 5.193     | 5.017 to 5.295     | 3.834 to 5.035    | 4.055 to 4.981    | 4.388 to 4.804     | 4.847 to 5.331     | 4.319 to 4.869    |
| k                        | 0.04710 to 0.06062 | 0.02598 to 0.03094 | 0.04438 to 0.1320 | 0.04726 to 0.1214 | 0.06412 to 0.07675 | 0.03163 to 0.04123 | 0.07994 to 0.1033 |
| Goodness of Fit          |                    |                    |                   |                   |                    |                    |                   |
| Degrees of Freedom       | 240                | 1492               | 264               | 462               | 297                | 344                | 378               |
| R square                 | 0.8559             | 0.717              | 0.2539            | 0.1969            | 0.9059             | 0.803              | 0.7778            |
| Absolute Sum of Squares  | 323.5              | 3209               | 1186              | 1909              | 320.3              | 557.6              | 801.7             |
| Sy.x                     | 1.161              | 1.467              | 2.119             | 2.033             | 1.039              | 1.273              | 1.456             |
| Number of points         |                    |                    |                   |                   |                    |                    |                   |
| Analyzed                 | 243                | 1495               | 267               | 465               | 300                | 347                | 381               |

|                          | RAL 136            | RAL 774            | RAL 787           | 6326             | Kenny              | RAL 73             | CG2247             |
|--------------------------|--------------------|--------------------|-------------------|------------------|--------------------|--------------------|--------------------|
| Logistic growth          |                    |                    |                   |                  |                    |                    |                    |
| Best-fit values          |                    |                    |                   |                  |                    |                    |                    |
| YM                       | 11.24              | 13.66              | 7.699             | 7.64             | 13.29              | 12.4               | 11.79              |
| Y0                       | 5.105              | 4.518              | 4.572             | 4.525            | 5.136              | 4.438              | 4.752              |
| k                        | 0.02258            | 0.05786            | 0.1095            | 0.1516           | 0.04105            | 0.07384            | 0.06361            |
| Std. Error               |                    |                    |                   |                  |                    |                    |                    |
| YM                       | 0.177              | 0.2552             | 0.1198            | 0.04989          | 0.2637             | 0.2575             | 0.1107             |
| Y0                       | 0.1257             | 0.1386             | 0.1985            | 0.09267          | 0.09536            | 0.1287             | 0.08871            |
| k                        | 0.001876           | 0.003534           | 0.02026           | 0.01329          | 0.002396           | 0.005019           | 0.002877           |
| 95% Confidence Intervals |                    |                    |                   |                  |                    |                    |                    |
| YM                       | 10.89 to 11.58     | 13.16 to 14.16     | 7.463 to 7.935    | 7.542 to 7.738   | 12.77 to 13.81     | 11.89 to 12.91     | 11.57 to 12.01     |
| Y0                       | 4.858 to 5.352     | 4.245 to 4.791     | 4.181 to 4.962    | 4.343 to 4.707   | 4.948 to 5.324     | 4.185 to 4.692     | 4.577 to 4.926     |
| k                        | 0.01889 to 0.02627 | 0.05090 to 0.06483 | 0.06964 to 0.1493 | 0.1255 to 0.1777 | 0.03633 to 0.04577 | 0.06395 to 0.08372 | 0.05795 to 0.06927 |
| Goodness of Fit          |                    |                    |                   |                  |                    |                    |                    |
| Degrees of Freedom       | 405                | 243                | 364               | 849              | 256                | 239                | 342                |
| R square                 | 0.7446             | 0.8582             | 0.3467            | 0.5201           | 0.8889             | 0.8433             | 0.8923             |
| Absolute Sum of Squares  | 767.3              | 418.1              | 962.8             | 1029             | 229.9              | 361.2              | 316.3              |
| Sy.x                     | 1.376              | 1.312              | 1.626             | 1.101            | 0.9476             | 1.229              | 0.9617             |
| Number of points         |                    |                    |                   |                  |                    |                    |                    |
| Analyzed                 | 408                | 246                | 367               | 852              | 259                | 242                | 345                |

**Table S4 Parameters from logistic curves of analysis (one initial dose):** The parameters of each logistic fit on the RAL lines, w<sup>1118</sup> and immune mutants are shown here. Data is cut off at the median time to death of each line. All lines were LN transformed to fit logistic curve.
