# Supplementary material for: Drosophila melanogaster Natural Variation Affects Growth Dynamics of Infecting Listeria monocytogenes
Source: PubMed Central journal article supplement (PMC4683632; doi:10.1534/g3.115.022558), 2015-10-04
Supplement: supp_g3.115.022558_TableS5.pdf [file supp_g3.115.022558_TableS5.pdf]

Table S5:

|                          | RAL 375            | RAL 309            | RAL 359           | RAL 821           | RAL 59             | RAL 732            | RAL 382           |
|--------------------------|--------------------|--------------------|-------------------|-------------------|--------------------|--------------------|-------------------|
| Logistic growth          |                    |                    |                   |                   |                    |                    |                   |
| Best-fit values          |                    |                    |                   |                   |                    |                    |                   |
| YM                       | 11.76              | 8.985              | 7.91              | 7.636             | 13.35              | 10.24              | 11.9              |
| Y0                       | 4.817              | 4.6                | 4.461             | 4.552             | 4.595              | 4.765              | 4.599             |
| k                        | 0.06217            | 0.07217            | 0.08054           | 0.07037           | 0.0705             | 0.0608             | 0.09109           |
| Std. Error               |                    |                    |                   |                   |                    |                    |                   |
| YM                       | 0.2304             | 0.08444            | 0.2914            | 0.2542            | 0.1734             | 0.2354             | 0.1751            |
| Y0                       | 0.1258             | 0.05699            | 0.2404            | 0.1993            | 0.1018             | 0.1306             | 0.1373            |
| k                        | 0.004542           | 0.003508           | 0.01884           | 0.01565           | 0.003224           | 0.005781           | 0.005915          |
| 95% Confidence Intervals |                    |                    |                   |                   |                    |                    |                   |
| YM                       | 11.30 to 12.21     | 8.820 to 9.151     | 7.335 to 8.485    | 7.136 to 8.136    | 13.01 to 13.69     | 9.781 to 10.71     | 11.55 to 12.24    |
| Y0                       | 4.569 to 5.065     | 4.488 to 4.711     | 3.986 to 4.935    | 4.160 to 4.944    | 4.395 to 4.796     | 4.507 to 5.022     | 4.329 to 4.869    |
| k                        | 0.05322 to 0.07113 | 0.06529 to 0.07906 | 0.04337 to 0.1177 | 0.03958 to 0.1012 | 0.06416 to 0.07685 | 0.04942 to 0.07218 | 0.07945 to 0.1027 |
| Goodness of Fit          |                    |                    |                   |                   |                    |                    |                   |
| Degrees of Freedom       | 198                | 937                | 182               | 308               | 289                | 268                | 370               |
| R square                 | 0.8562             | 0.7406             | 0.3726            | 0.2877            | 0.9108             | 0.7286             | 0.7833            |
| Absolute Sum of Squares  | 199.5              | 848.2              | 508.4             | 939.3             | 285.3              | 365.1              | 753.1             |
| Sy.x                     | 1.004              | 0.9515             | 1.671             | 1.746             | 0.9937             | 1.167              | 1.427             |
|                          |                    |                    |                   |                   |                    |                    |                   |
| Number of points         |                    |                    |                   |                   |                    |                    |                   |
| Analyzed                 | 201                | 940                | 185               | 311               | 292                | 271                | 373               |

|                          | RAL 136            | RAL 774            | RAL 787           | 6326             | Kenny              | RAL 73             | CG2247             |
|--------------------------|--------------------|--------------------|-------------------|------------------|--------------------|--------------------|--------------------|
| Logistic growth          |                    |                    |                   |                  |                    |                    |                    |
| Best-fit values          |                    |                    |                   |                  |                    |                    |                    |
| YM                       | 10.99              | 13.66              | 7.53              | 7.685            | 12.16              | 12.4               | 11.04              |
| Y0                       | 4.894              | 4.522              | 4.546             | 4.529            | 5.008              | 4.438              | 4.632              |
| k                        | 0.02926            | 0.05771            | 0.1223            | 0.1482           | 0.05072            | 0.07384            | 0.07716            |
| Std. Error               |                    |                    |                   |                  |                    |                    |                    |
| YM                       | 0.3249             | 0.3371             | 0.1237            | 0.06796          | 0.2631             | 0.2575             | 0.1433             |
| Y0                       | 0.1151             | 0.1381             | 0.1256            | 0.07711          | 0.09777            | 0.1287             | 0.08176            |
| k                        | 0.002751           | 0.003965           | 0.01711           | 0.01181          | 0.0034             | 0.005019           | 0.003922           |
| 95% Confidence Intervals |                    |                    |                   |                  |                    |                    |                    |
| YM                       | 10.35 to 11.63     | 13.00 to 14.33     | 7.286 to 7.774    | 7.551 to 7.818   | 11.64 to 12.68     | 11.89 to 12.91     | 10.76 to 11.32     |
| Y0                       | 4.667 to 5.120     | 4.250 to 4.794     | 4.298 to 4.793    | 4.377 to 4.680   | 4.816 to 5.201     | 4.185 to 4.692     | 4.471 to 4.793     |
| k                        | 0.02384 to 0.03468 | 0.04990 to 0.06552 | 0.08862 to 0.1560 | 0.1250 to 0.1714 | 0.04402 to 0.05742 | 0.06395 to 0.08372 | 0.06944 to 0.08488 |
| Goodness of Fit          |                    |                    |                   |                  |                    |                    |                    |
| Degrees of Freedom       | 260                | 229                | 238               | 547              | 240                | 239                | 286                |
| R square                 | 0.7224             | 0.8502             | 0.5791            | 0.6527           | 0.8698             | 0.8433             | 0.8873             |
| Absolute Sum of Squares  | 338.8              | 373.1              | 239.4             | 457.4            | 203                | 361.2              | 203.2              |
| Sy.x                     | 1.142              | 1.276              | 1.003             | 0.9145           | 0.9197             | 1.229              | 0.8429             |
| Number of points         |                    |                    |                   |                  |                    |                    |                    |
| Analyzed                 | 263                | 232                | 241               | 550              | 243                | 242                | 289                |

**Table S5 Parameters from logistic curves of analysis (one initial dose):** The parameters of each logistic fit on the RAL lines, w<sup>1118</sup> and immune mutants are shown here. Data is cut of 72 hours post infection. All lines were LN transformed to fit logistic curve.
