# Supplementary material for: Drosophila melanogaster Natural Variation Affects Growth Dynamics of Infecting Listeria monocytogenes
Source: PubMed Central journal article supplement (PMC4683632; doi:10.1534/g3.115.022558), 2015-10-04
Supplement: supp_g3.115.022558_TableS6.pdf [file supp_g3.115.022558_TableS6.pdf]

Table S6:

|                          | RAL 309<br>10 <sup>1</sup> | RAL 309<br>10 <sup>2</sup> | RAL 309<br>10 <sup>3</sup> | RAL 309<br>10 <sup>4</sup> | RAL 309<br>10 <sup>5</sup> | 6326 10 <sup>1</sup> | 6326 10 <sup>2</sup> | 6326 10 <sup>3</sup> |
|--------------------------|----------------------------|----------------------------|----------------------------|----------------------------|----------------------------|----------------------|----------------------|----------------------|
| Logistic growth          |                            |                            |                            |                            | Not converged              |                      |                      |                      |
| Best-fit values          |                            |                            |                            |                            |                            |                      |                      |                      |
| YM                       | 9.564                      | 11.14                      | 11.98                      | 12.23                      |                            | 7.595                | 7.631                | 9.107                |
| Y0                       | 3.388                      | 5.253                      | 7.13                       | 9.223                      |                            | 3.144                | 4.382                | 6.761                |
| k                        | 0.02526                    | 0.03044                    | 0.03172                    | 0.03405                    |                            | 0.05026              | 0.1583               | 0.1752               |
| Std. Error               |                            |                            |                            |                            |                            |                      |                      |                      |
| YM                       | 0.2248                     | 0.08557                    | 0.1246                     | 0.1477                     |                            | 0.1087               | 0.05296              | 0.07809              |
| Y0                       | 0.2362                     | 0.08825                    | 0.119                      | 0.1256                     |                            | 0.2121               | 0.09739              | 0.1988               |
| k                        | 0.00337                    | 0.00156                    | 0.00267                    | 0.00509                    |                            | 0.00705              | 0.01416              | 0.03529              |
| 95% Confidence Intervals |                            |                            |                            |                            |                            |                      |                      |                      |
| YM                       | 9.122 to 10.01             | 10.97 to 11.31             | 11.73 to 12.22             | 11.94 to 12.52             |                            | 7.382 to 7.809       | 7.527 to 7.735       | 8.953 to 9.260       |
| Y0                       | 2.924 to 3.852             | 5.080 to 5.426             | 6.896 to 7.364             | 8.976 to 9.471             |                            | 2.727 to 3.560       | 4.191 to 4.573       | 6.370 to 7.152       |
| k                        | 0.01864 to 0.03189         | 0.02738 to 0.03349         | 0.02648 to 0.03696         | 0.02403 to 0.04408         |                            | 0.03642 to 0.06411   | 0.1305 to 0.1861     | 0.1058 to 0.2445     |
| Goodness of Fit          |                            |                            |                            |                            |                            |                      |                      |                      |
| Degrees of Freedom       | 432                        | 1102                       | 425                        | 281                        |                            | 515                  | 855                  | 444                  |
| R square                 | 0.4848                     | 0.7129                     | 0.7037                     | 0.5454                     |                            | 0.4345               | 0.5128               | 0.2328               |
| Absolute Sum of Squares  | 2752                       | 2263                       | 583                        | 266.9                      |                            | 1790                 | 1182                 | 762.6                |
| Sy.x                     | 2.524                      | 1.433                      | 1.171                      | 0.9745                     |                            | 1.864                | 1.176                | 1.311                |
| Number of points         |                            |                            |                            |                            |                            |                      |                      |                      |
| Analyzed                 | 435                        | 1105                       | 428                        | 284                        | 261                        | 518                  | 858                  | 447                  |

|                          | 6326 10 <sup>4</sup>    | 6326 10 <sup>5</sup>      | RAL 508<br>10 <sup>1</sup> | RAL 508<br>10 <sup>2</sup> | RAL 508<br>10 <sup>3</sup> | RAL 508<br>10 <sup>4</sup> | RAL 508<br>10 <sup>5</sup> |
|--------------------------|-------------------------|---------------------------|----------------------------|----------------------------|----------------------------|----------------------------|----------------------------|
| Logistic growth          |                         |                           |                            |                            |                            |                            |                            |
| Best-fit values          |                         |                           |                            |                            |                            |                            |                            |
| YM                       | 9.58                    | 5.896                     | 11.39                      | 13.9                       | 14.57                      | 12.61                      | 13.35                      |
| Y0                       | 8.998                   | 11.86                     | 2.562                      | 4.552                      | 6.656                      | 9.214                      | 11.3                       |
| k                        | 0.2329                  | 0.003272                  | 0.05702                    | 0.05573                    | 0.04879                    | 0.09029                    | 0.1018                     |
| Std. Error               |                         |                           |                            |                            |                            |                            |                            |
| YM                       | 0.08623                 | 12.69                     | 0.4068                     | 0.2944                     | 0.7264                     | 0.2758                     | 0.386                      |
| Y0                       | 0.2161                  | 0.1882                    | 0.1708                     | 0.1357                     | 0.1577                     | 0.232                      | 0.1933                     |
| k                        | 0.214                   | 0.01541                   | 0.00502                    | 0.003498                   | 0.00641                    | 0.02117                    | 0.0436                     |
| 95% Confidence Intervals |                         |                           |                            |                            |                            |                            |                            |
| YM                       | 9.410 to<br>9.750       | -19.12 to<br>30.92        | 10.58 to<br>12.19          | 13.32 to<br>14.48          | 13.14 to<br>16.00          | 12.06 to<br>13.15          | 12.58 to<br>14.11          |
| Y0                       | 8.573 to<br>9.424       | 11.49 to<br>12.23         | 2.226 to<br>2.899          | 4.285 to<br>4.820          | 6.345 to<br>6.967          | 8.756 to<br>9.671          | 10.92 to<br>11.68          |
| k                        | -0.1882<br>to<br>0.6540 | -0.02710<br>to<br>0.03364 | 0.04713<br>to<br>0.06690   | 0.04884<br>to<br>0.06262   | 0.03615<br>to<br>0.06142   | 0.04854<br>to<br>0.1320    | 0.01557<br>to<br>0.1880    |
| Goodness of Fit          |                         |                           |                            |                            |                            |                            |                            |
| Degrees of Freedom       | 300                     | 211                       | 217                        | 237                        | 193                        | 195                        | 136                        |
| R square                 | 0.02145                 | 0.161                     | 0.7707                     | 0.861                      | 0.783                      | 0.3943                     | 0.2584                     |
| Absolute Sum of Squares  | 441                     | 425.2                     | 554.6                      | 389                        | 257.6                      | 423.2                      | 172.4                      |
| Sy.x                     | 1.212                   | 1.42                      | 1.599                      | 1.281                      | 1.155                      | 1.473                      | 1.126                      |
| Number of points         |                         |                           |                            |                            |                            |                            |                            |
| Analyzed                 | 303                     | 214                       | 220                        | 240                        | 196                        | 198                        | 139                        |

**Table S6 Statistical parameters from logistic curves analysis (varying initial dose):** The parameters of each logistic fit on the five initial doses given to the three *Drosophila* lines. Data is cut off at the median time to death of each line. All lines were LN transformed to fit logistic curve.
